# Supplementary material for: MicroRNA-mediated regulation of gene expression is affected by disease-associated SNPs within the 3′-UTR via altered RNA structure
Source: PubMed Central journal article supplement — RNA Biol. 2012 Jun 1;9(6):924–37. doi: 10.4161/rna.20497 (PMC3495750; doi:10.4161/rna.20497), 2012-06-01
Supplement: rna-9-924-s01.pdf [file rna-9-924-s01.pdf]

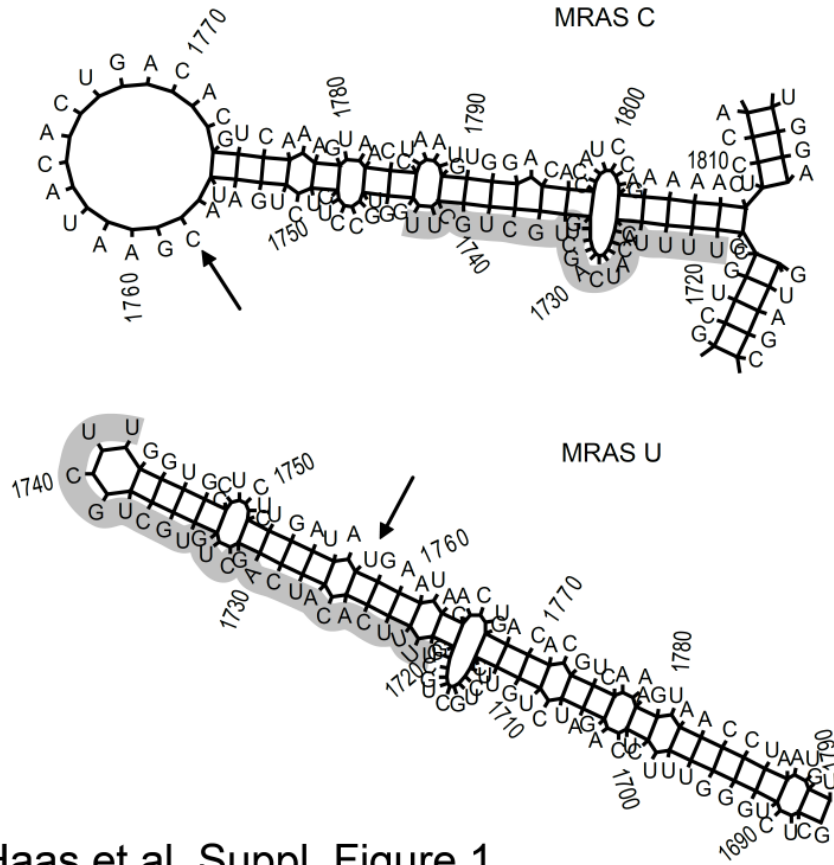

Haas et al. Suppl. Figure 1

**Supplementary Figure 1.**

Predicted secondary structures for MRAS variants C (upper panel) and U (lower panel). The arrow indicates the position of the SNP rs9818870 and the miR-195 target site is highlighted in grey. The numbering is according to the position in the *MRAS* mRNA (see Figure 5). The structures exemplarily illustrate differences in local RNA structure predictions between the two MRAS variants (see Figure 5) which affect the SNP site as well as the miRNA binding site (highlighted in grey) that is located directly upstream of the SNP.



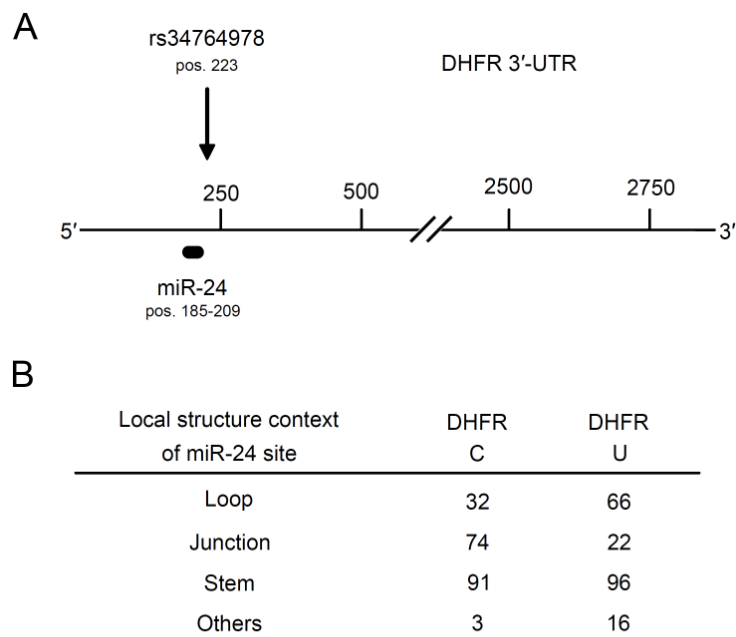

Haas et al. Suppl. Figure 3

**Supplementary Figure 3.**

(A) schematically shows the *DHFR* 3'-UTR with the SNP rs34764978 at position 223 and the miR-24 target site located 14 nt upstream of the polymorphic site. Secondary structures of the miR-24 target site-containing polymorphic RNAs were predicted via mfold and results are listed in (B).
